# Supplementary material
Source: PubMed Central journal article supplement (PMC2816622)
Supplement: embor2009254-s1.pdf [file embor2009254-s1.pdf]

## Supplementary Information

| Mouse rDNA primers    | Sequence                 |
|-----------------------|--------------------------|
| -2175/-2155 For       | 5'-TAGTGGTGACAAGTTTCGGGA |
| -1994/-1975 For       | 5'-GCAGACCGAGTTGCTGTAC   |
| -1953/-1933 Rev       | 5'-CTAGTAACGTTGCCACCAAC  |
| -554/-535 For         | 5'-GAAGCCCTCTTGTCCCCGTC  |
| -466/447 Rev          | 5'-GATCCAAAGCTCCAGCTGAC  |
| -232/-214 For         | 5'-GAAAGCTATGGGCCGCGGT   |
| -160/-140 Rev         | 5'-CCGGACCTCAAAGGAACAAC  |
| -20/-39 Rev           | 5'-AAGAACAGATAGAAAAGATCA |
| -21/-1 Rev            | 5'-ACCTATCTCCAGGTCCAATAG |
| +550/+570 For         | 5'-CTCTTGTTCTGTGTCTGCC   |
| +745/+765 Rev         | 5'-GCCCGCTGGCAGAACGAGAAG |
| +2251/+2270 For       | 5'-GCATCGGTGTGTCCGGCATCG |
| +2346/+2365 Rev       | 5'-CTGAGCAGTCCCACCACACC  |
| mExoSC3(242-262) For  | 5'-GTCTGCTGGTCACCAAGTGTG |
| mExoSC3 (347-356) Rev | 5'-GTGGTCCCCTTTCACAGGTAC |

**Table S1.** Sequences of primers used in this study.

## Supplementary Figure Legends

**Fig. S1** Ectopic TIF-IA activates transcription from the pre-rRNA and the spacer promoter. NIH3T3 cells were transfected with pMr-1922/+130-BH (left panel, pre-rRNA) and pMr-2172/1933-BH (right panel, IGS rRNA) in the absence or presence of 0.3 and 0.9  $\mu$ g of an expression vector encoding TIF-IA. Values were normalized to the levels of a co-transfected luciferase reporter gene and to GAPDH mRNA.

**Fig. S2** The steady-state level of IGS rRNA does not change during the cell cycle. Levels of IGS rRNA and pre-rRNA in serum-starved NIH3T3 cells (G<sub>0</sub>), in cells arrested at G<sub>1</sub>/S by treatment with aphidicolin (1  $\mu$ g/ml, 18 h), and at G<sub>2</sub>/M by treatment with nocodazole (40  $\mu$ g/ml, 16 h). Values were normalized to GAPDH and to RNA levels in asynchronous cells (As.).

**Fig. S3** Biphasic replication of rDNA. NIH3T3 cells synchronized at G<sub>1</sub>/S were released into S-phase and pulse-labeled with BrdU in 1h intervals. Nascent DNA was immunoprecipitated with anti-BrdU antibody. To control S-phase progression, a known early-replicating gene ( $\alpha$ -

globin) and a late-replicating locus (X141) were amplified. Genomic DNA (g) from asynchronous NIH3T3 cells was used as control.

**Fig. S4** IGS rRNA is degraded by the exosome. The levels of IGS rRNA, pRNA and pre-rRNA were monitored by RT-qPCR after siRNA mediated depletion of ExoSC3. The knockdown of ExoSC3 was monitored by RT-qPCR of ExoSC3 mRNA (ExoSC3). The bar diagram shows transcript levels normalized to GAPDH mRNA. Error bars indicate +/- SD.

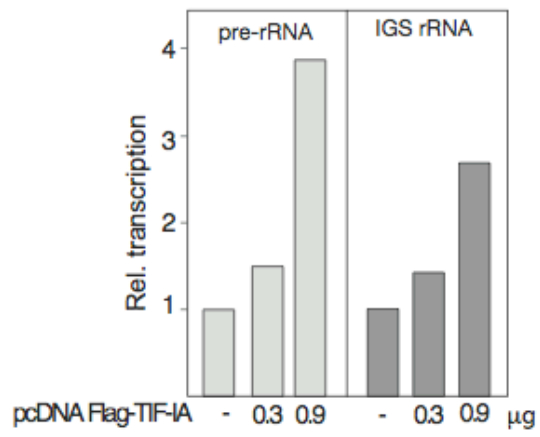

Santoro et al. Figure S1

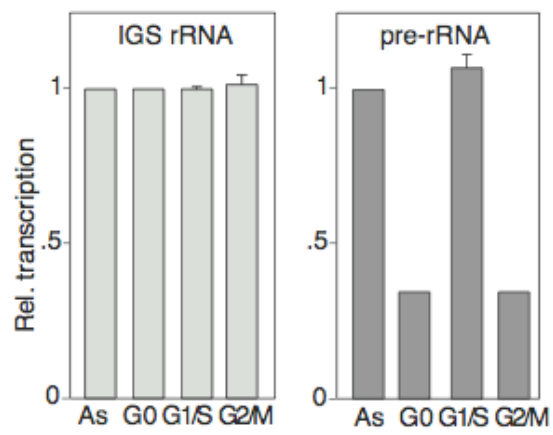

Santoro et al. Figure S2

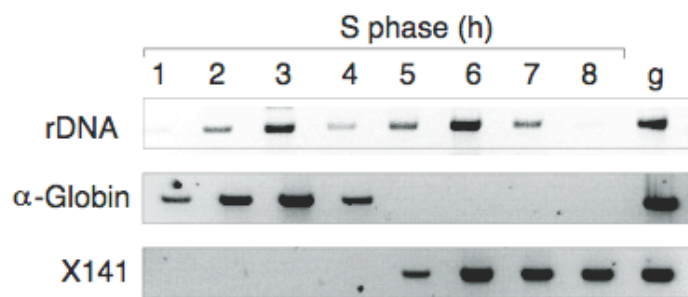

Santoro et al. Figure S3

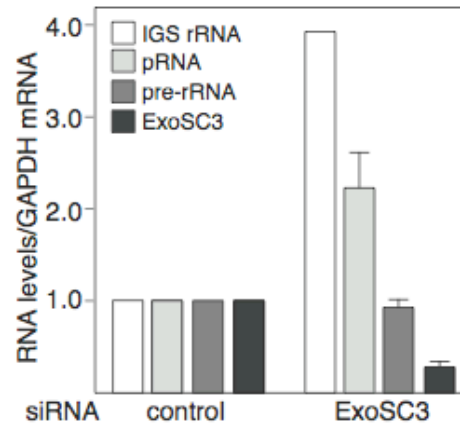

Santoro et al. Figure S4
